# Supplementary material for: “My Body is a Ticking Time Bomb”: Associations of Body Mindsets with Psychological Distress in People with Chronic Kidney Disease
Source: Research Square preprint supplement (doi:10.21203/rs.3.rs-6464039/v1), 2025-05-07
Supplement: Supplementary file 1 [file bb47ee4b144a42c1fdef516d.docx]

**Supplementary Materials**

**Table 1.**

Associations of Body Mindsets with Treatment Modalities and Demographic Factors with Multiple Imputed Dataset.

|  | Age (*r*) | Sex (*t*) | Treatment Modalities (F) |
| --- | --- | --- | --- |
| Body is an Adversary | -.033 | 1.11 | 8.04*** |
| Body is Capable | .047 | 1.08 | 3.11* |
| Body is Responsive | -.009 | 1.67 | 2.37 |
| Psychological Distress | -.269*** | -.30 | 1.73 |
| Comorbidities | .279*** | 1.62 | 2.56* |

**p*< .05, ***p*< .01, ****p*< .001.

**Table 2.**

Associations of Body Mindsets, Psychological Distress, and Comorbidities with Multiple Imputed Dataset.

|  | 1. | 2. | 3. | 4. | 5. |
| --- | --- | --- | --- | --- | --- |
| 1. Body is an Adversary | 1 |  |  |  |  |
| 1. Body is Capable | -.311*** | 1 |  |  |  |
| 1. Body is Responsive | -.316*** | .579*** | 1 |  |  |
| 1. Psychological Distress | .335*** | -.310*** | -.302*** | 1 |  |
| 1. Comorbidities | .169* | -.210** | -.230*** | .164* | 1 |

**p*< .05, ***p*< .01, ****p*< .001.

**Table 3.**

Unique Associations of Body Mindsets with Psychological Distress Beyond Demographic Factors, Treatment Modalities and Comorbidities with Multiple Imputed Dataset.

|  |  | **Step 1** | **Step 2** | **Step 3a** | **Step 3b** | **Step 3c** | **Step 4** |
| --- | --- | --- | --- | --- | --- | --- | --- |
| Demographic Factors | Sex | -.02 (-1.20, .88) | -.01 (-1.15 .93) | -.02 (-1.16, .85) | -.05 (-1.34, .65) | .01 (-.89, 1.05) | -.02 (1.13, .87) |
| Age | -.29*** (-1.09, -.40) | -.37*** (-1.28, -.58) | -.34*** (-1.22, -.53) | -.36*** (-1.26, -.58) | -.34*** (-1.20, -.52) | -.32*** (-1.19, -.51) |
|  |  |  |  |  |  |  |  |
| Medical-Related Factors | Transplant |  | .00(-1.20, 1.20) | .004 (-1.14, 1.21) | .01 (-1.16, 1.18) | .08 (-.56, 1.78) | .07 (-.65, .1.72) |
| Advanced Care |  | .03 (-1.14, 1.69) | -.01 (-1.45, .1.34) | .001 (-1.34, 1.34) | -.01 (-1.44, 1.23) | -.03 (-1.63, 1.10) |
| Supportive Care |  | .01 (-1.38, 1.54) | -.01 (-1.35, 1.50) | -.01 (-1.50, 1.34) | .02 (-1.17, 1.60) | .03 (-1.17, 1.67) |
| Comorbidities |  | .27*** (.18, .57) | .22* (.11, .50) | .21* (.11, .48) | .23*** (.14, .50) | .19* (.08, .45) |
|  |  |  |  |  |  |  |
| Body Mindsets | Body is Capable |  |  | -.23*** (-1.26, -.35) |  |  | -.09 (-.87, .22) |
| Body is Responsive |  |  |  | -.26*** (-1.29, -.43) |  | -.13 (.96, .09) |
| Body is Adversary |  |  |  |  | .32*** (.59, 1.38) | .26*** (.39, 1.24) |
| *Adj R*2 |  | .07 | .13 | .17 | .19 | .21 | .24 |
| *F* Statistic |  | 9.44*** | 6.12*** | 7.25*** | 7.790*** | 9.23*** | 8.01*** |
